# Supplementary material for: Construction of paper-based long-life room temperature phosphorescence probe for tetracycline detection using nitrogen and phosphorus co doped corn whiskers carbon dots
Source: Research Square preprint supplement (doi:10.21203/rs.3.rs-7898388/v1), 2025-11-05
Supplement: Supplementary file 1 [file 67e4f88b5aceff63f488d6c5.docx]

**Supporting Information**

**Construction of paper-based long-life room temperature phosphorescence probe for tetracycline detection using nitrogen and phosphorus co doped corn whiskers carbon dots**

Yuting Xu, Yuxin Zheng, Kamile Arkin, Xue Jiang, Kexin Li, Qingkun Shang *

*School of Chemistry, Northeast Normal University, Changchun, 130024*

*Corresponding author: Prof. Qingkun Shang, shangqk995@nenu.edu.cn

**Figure S1.** The XPS high-resolution P 2p (a) and B 1s (b) spectra of NP-CDs and NP-CDs@matrix


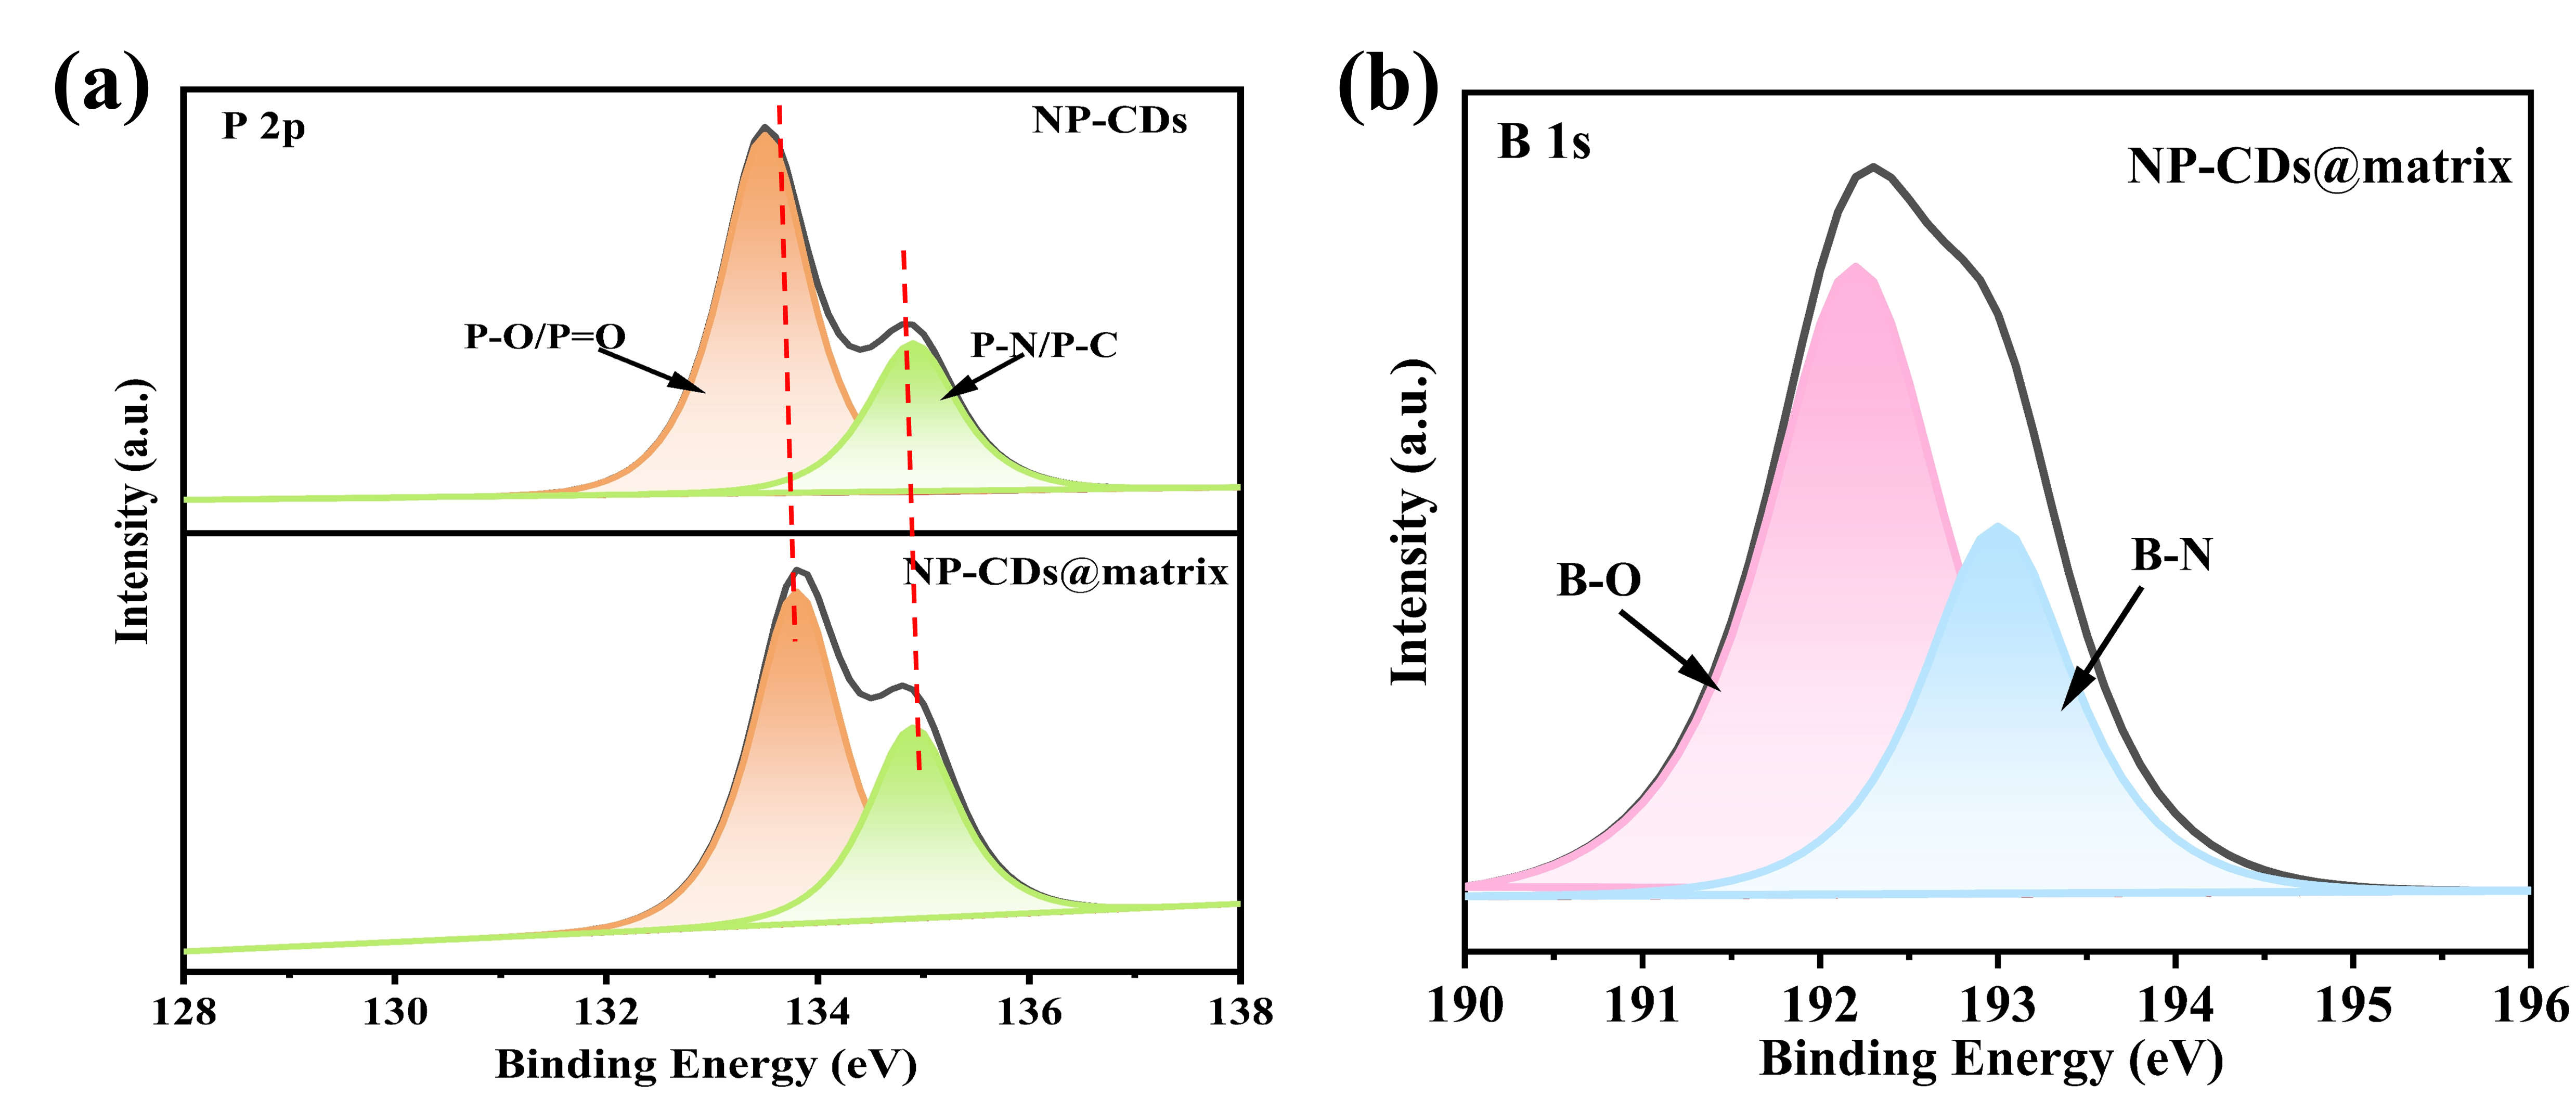


**Figure S2.** UV–Vis spectra (a ,c), and fluorescence spectra (b, d) of CDs and NP-CDs.

**
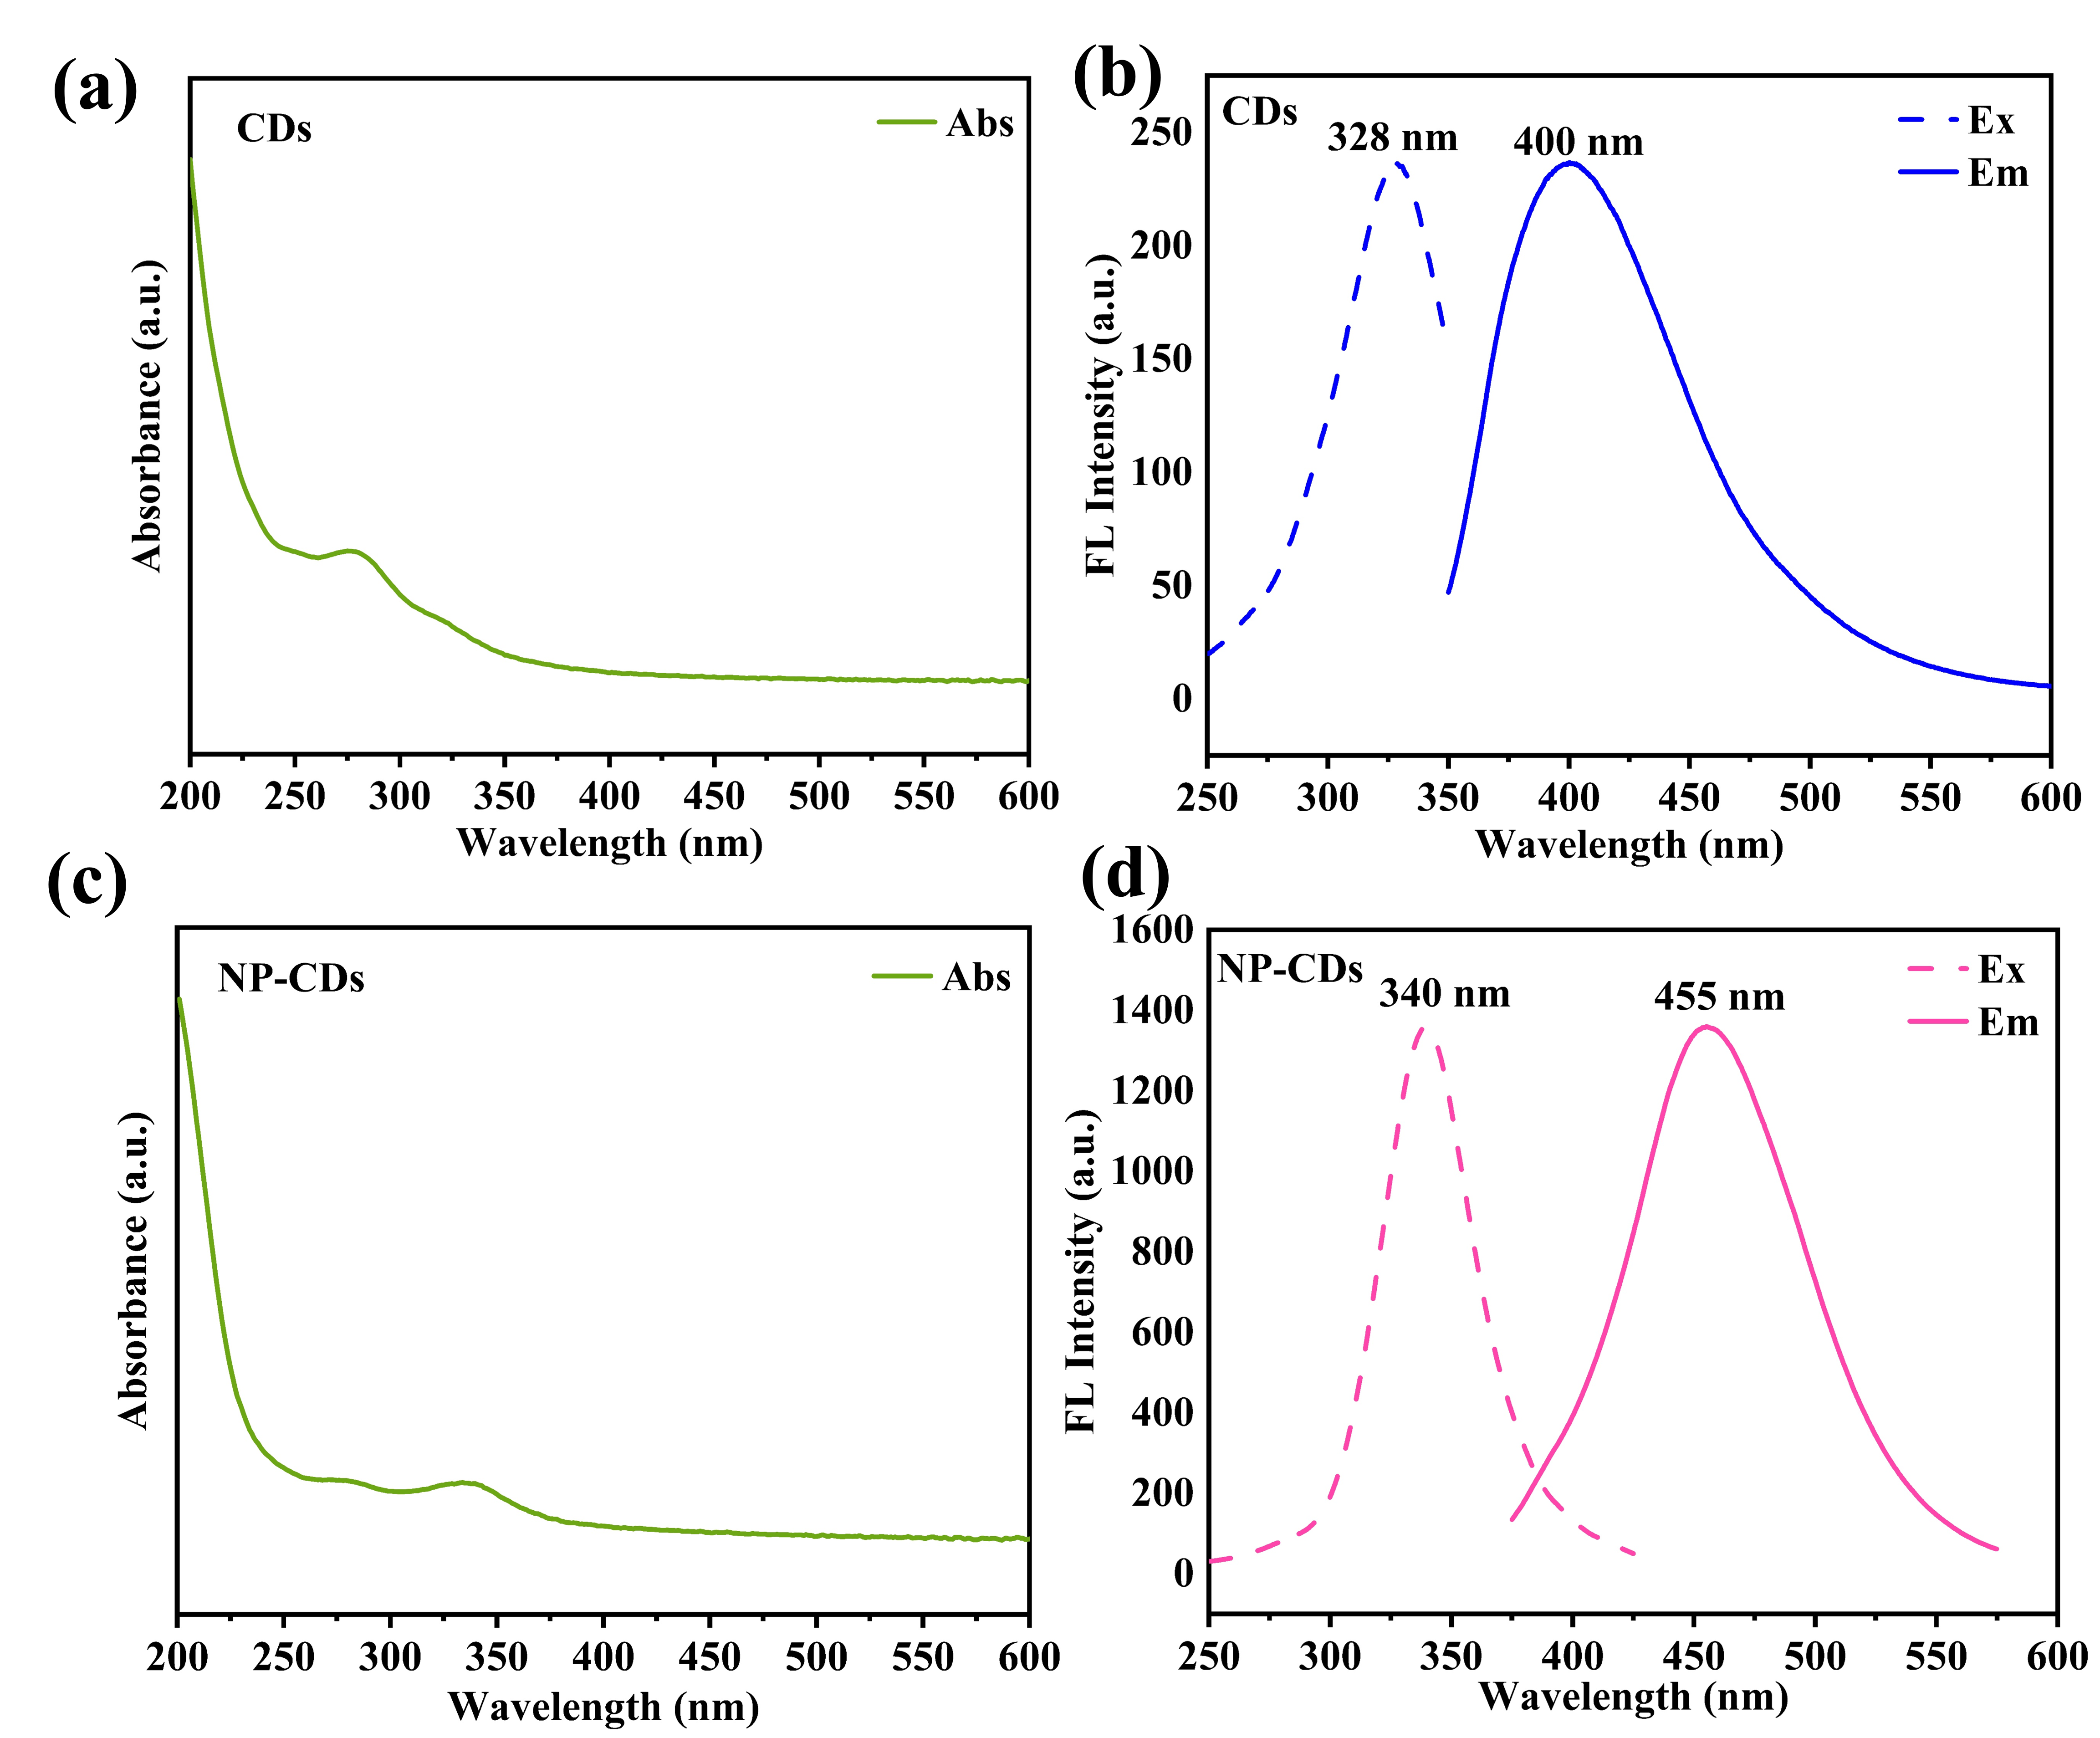
**

**Figure S3.** Phosphorescence emission spectra of NP-CDs@matrix under different excitation wavelength.


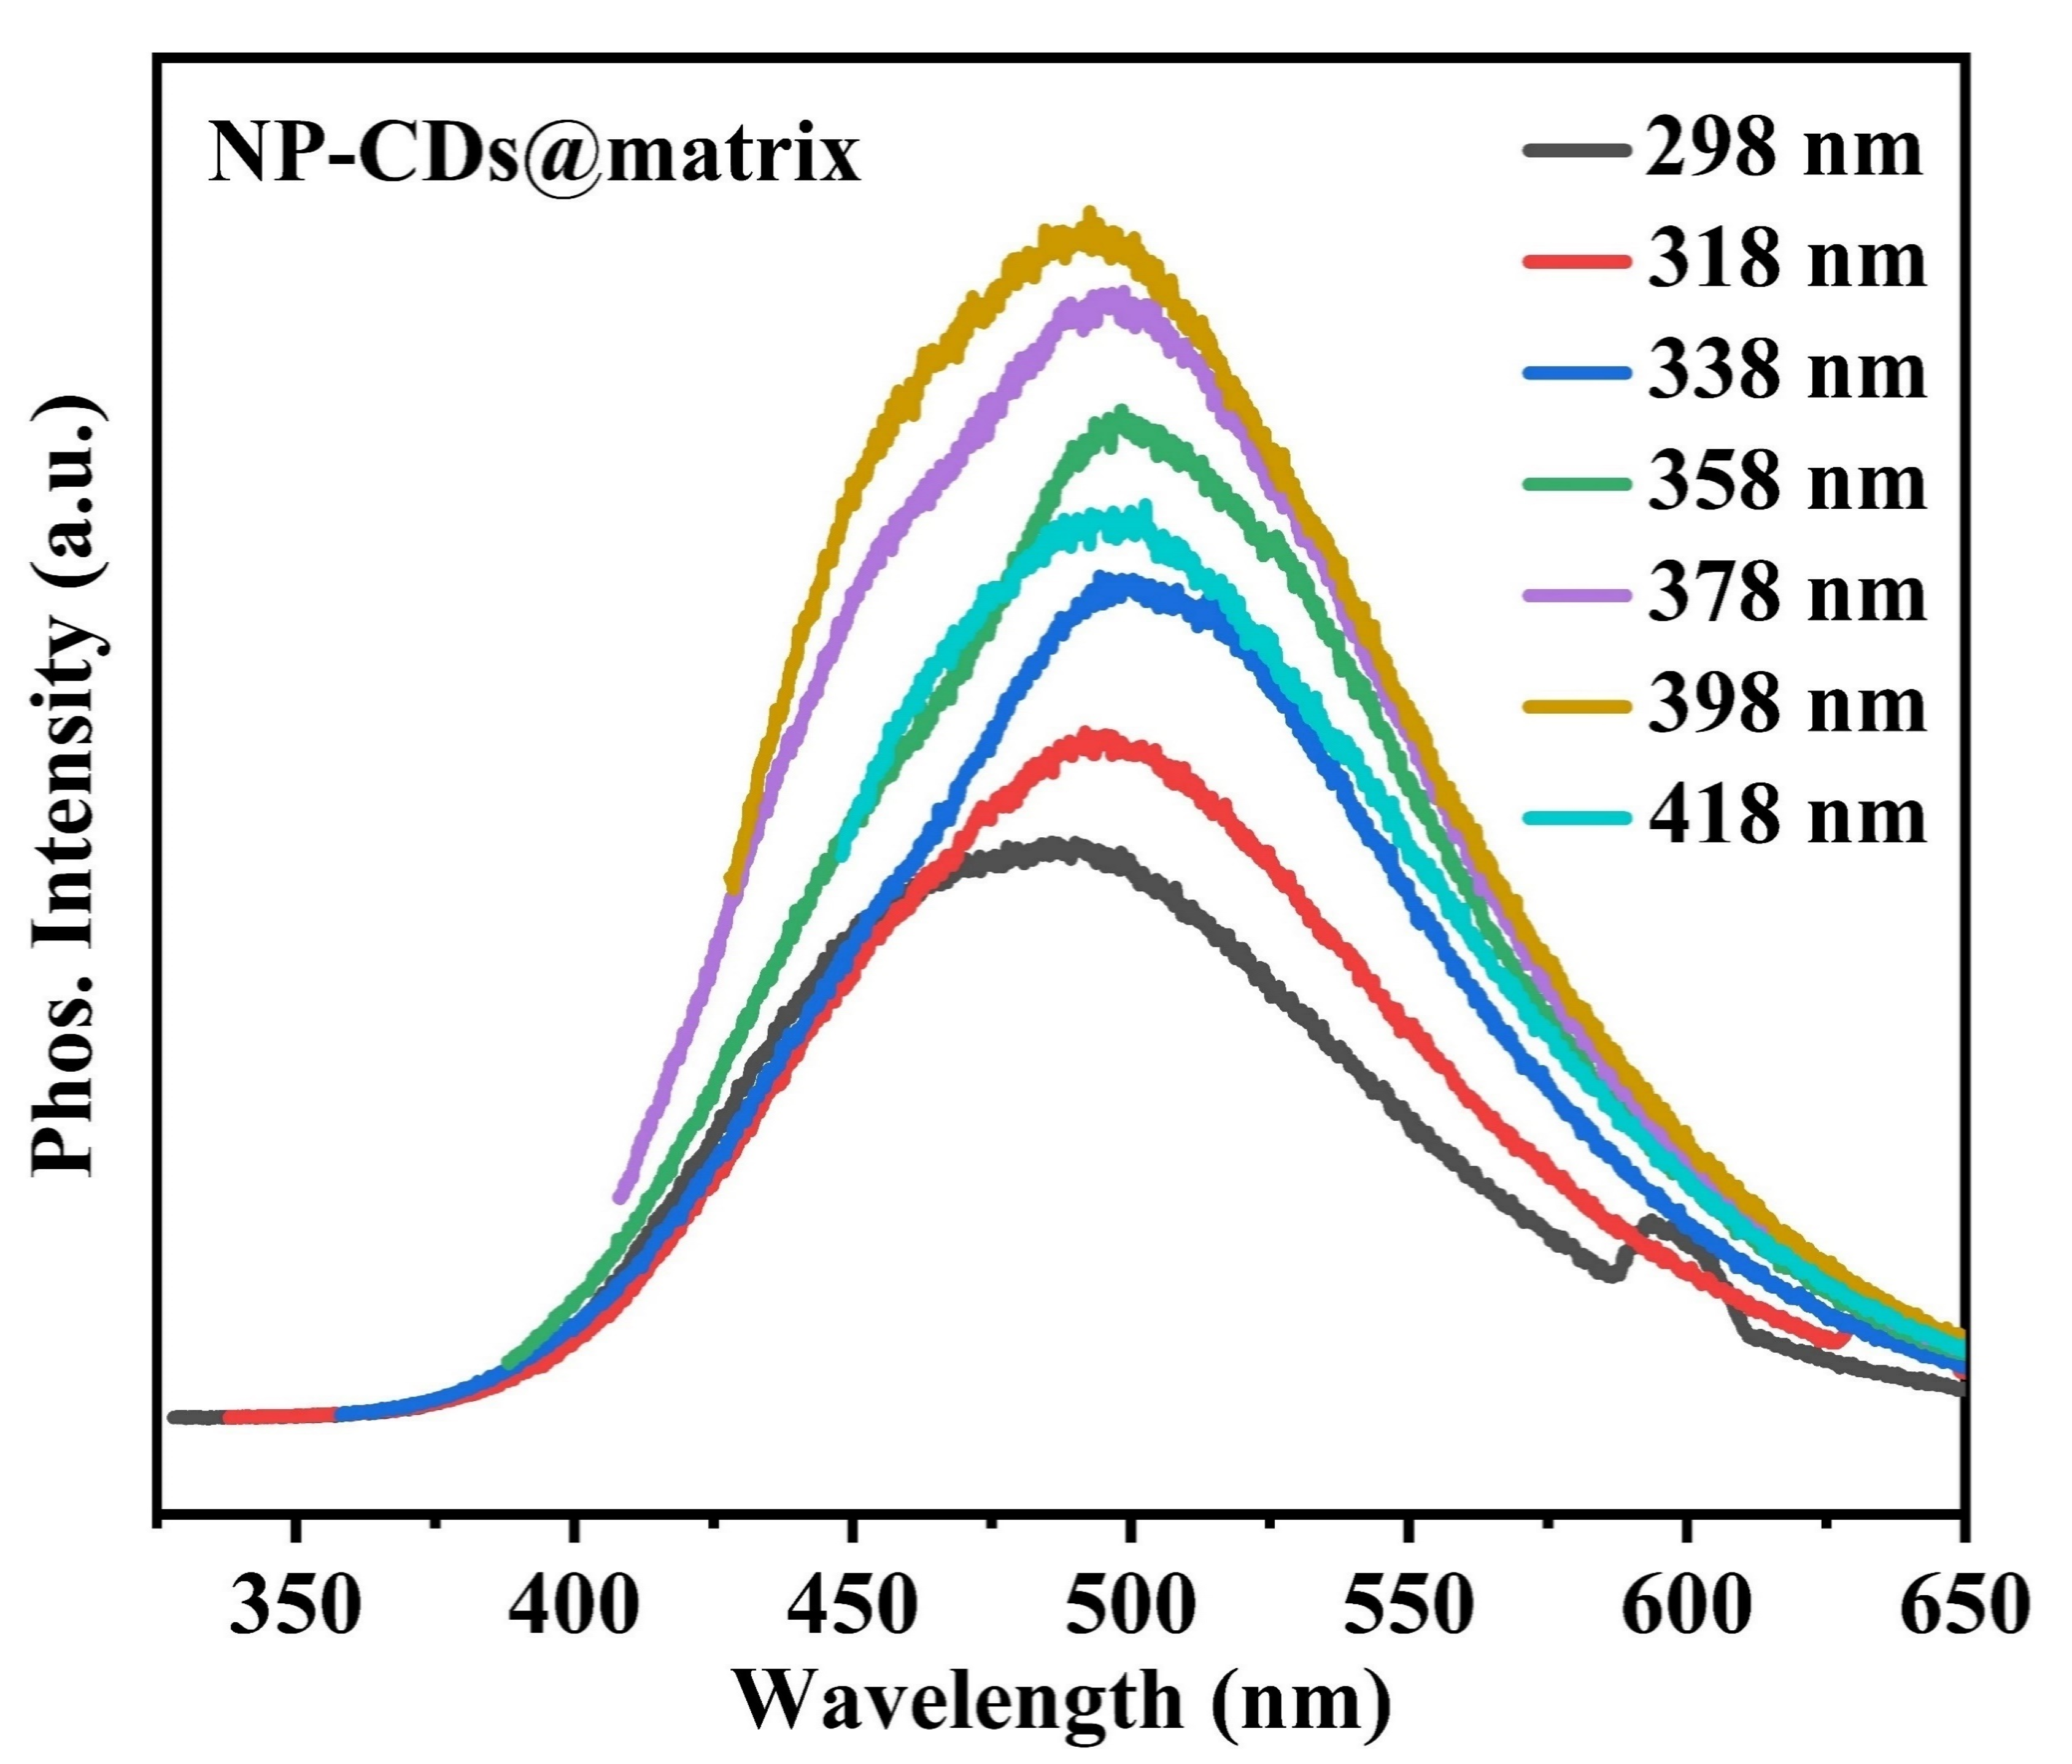


**Figure S4.** Phosphorescence spectra of NP-CDs@matrix, matrix(B), matrix(U) and matrix.


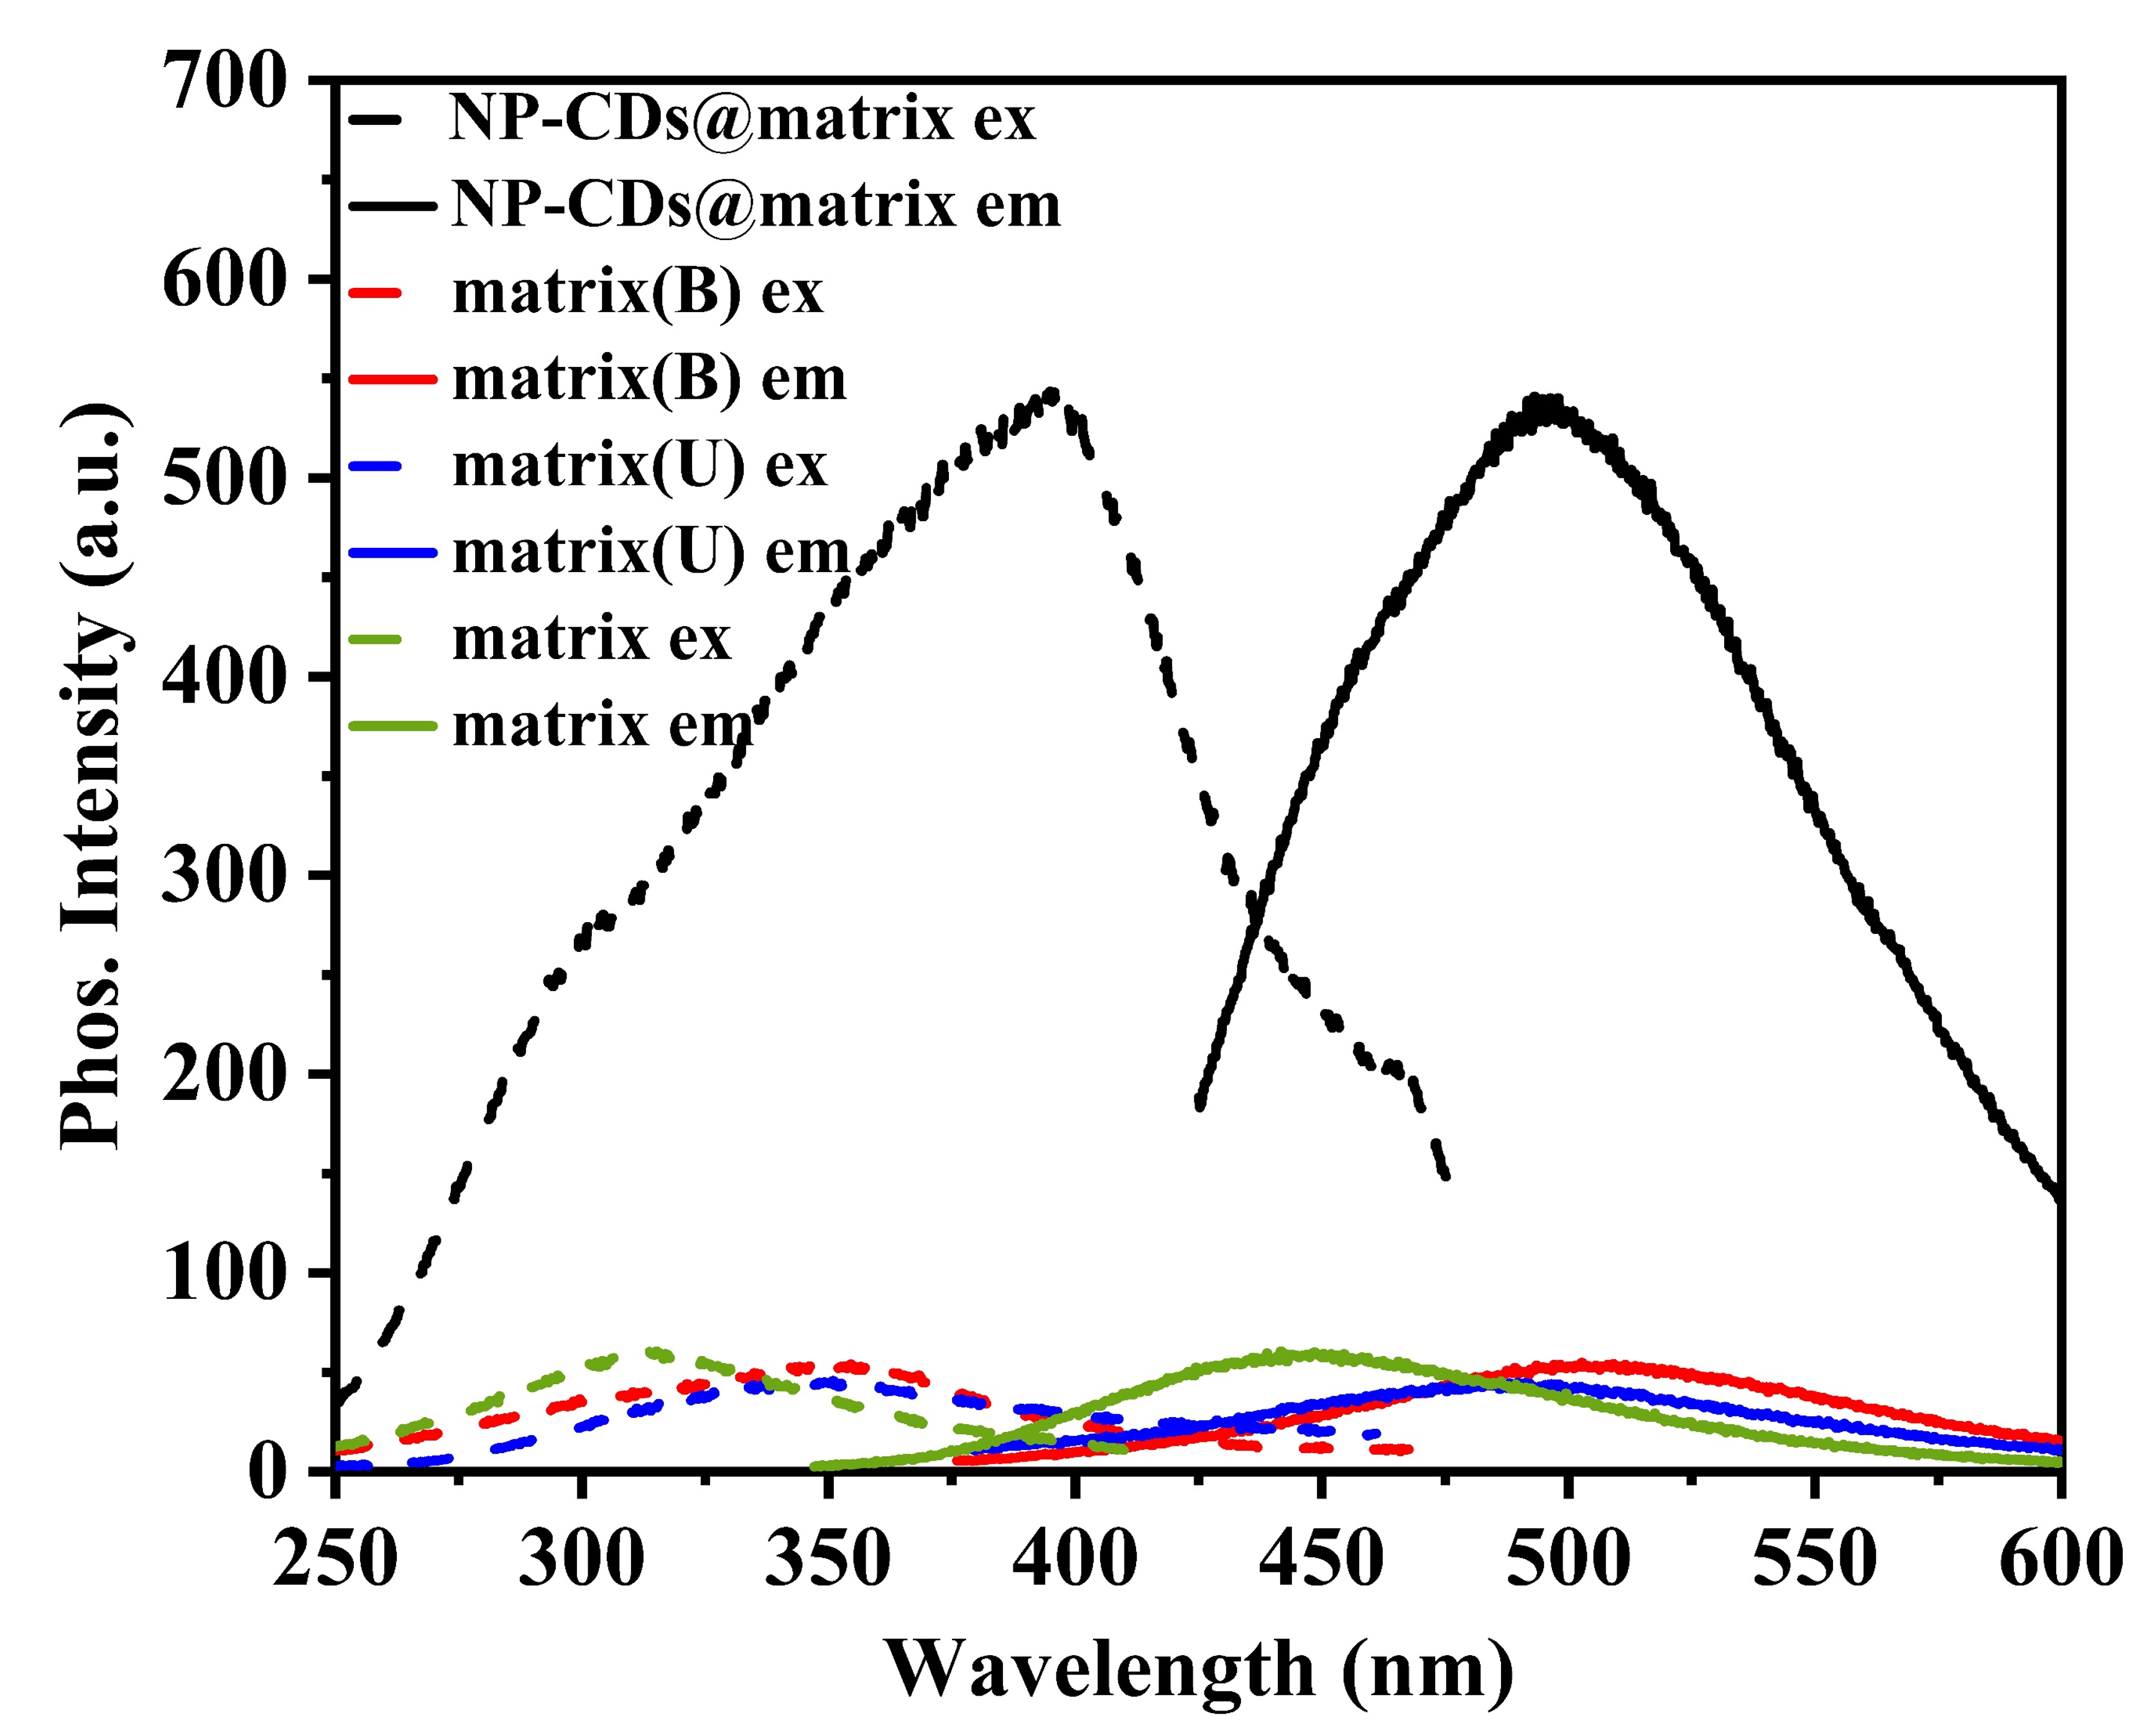


**Figure S5.** Effect of irradiation time (a) and storage time (b) on the phosphorescent intensity of the NP-CDs@matrix.


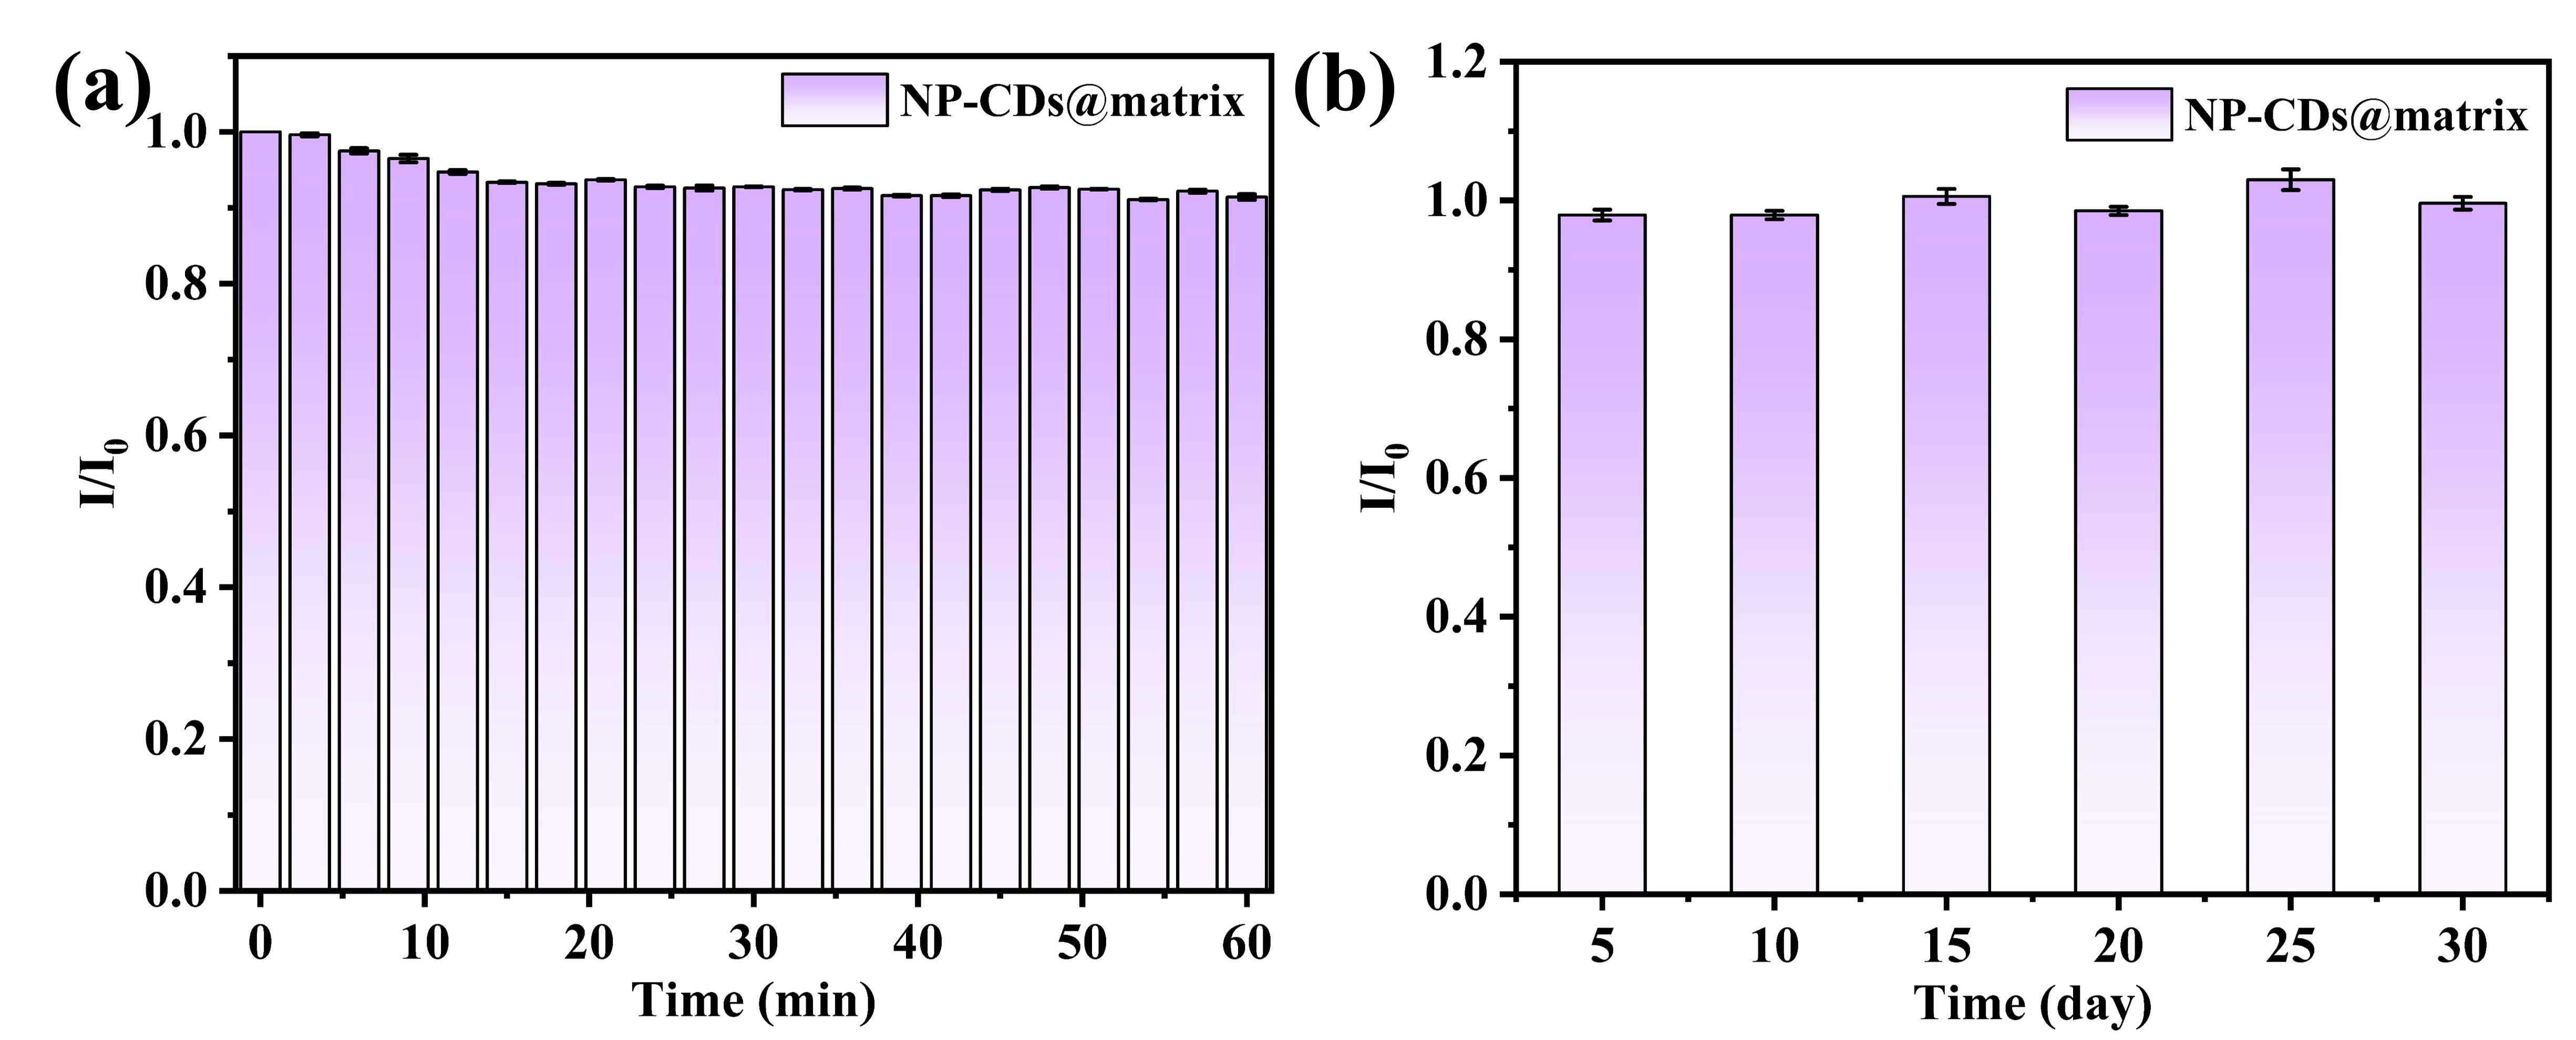


**Figure S6.** Effect of irradiation time (a), salt resistance(b) and storage time (c) on the phosphorescent intensity of the NP-CDs@matrix@paper.


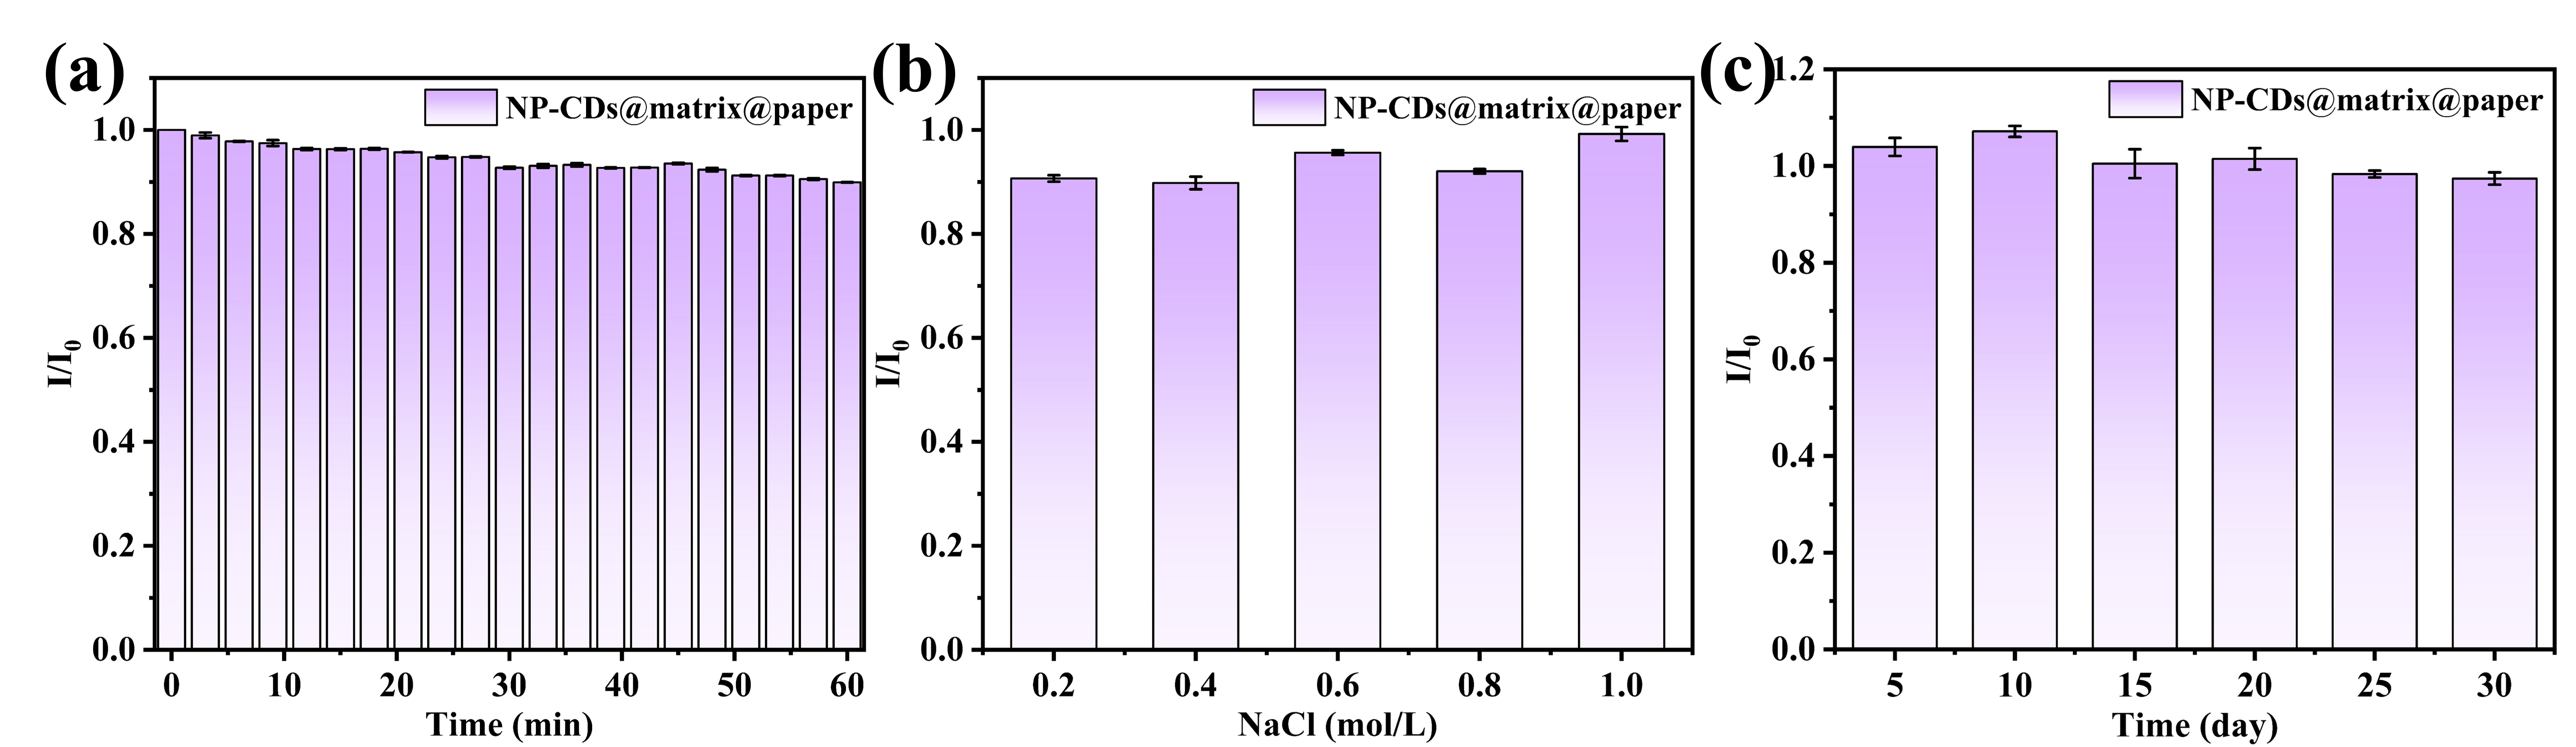


**Figure S7.** 3D waterfall (a, c, e) and histogram (b, d, f) of the selectivity of the probe for different cations, anions and amino acids.


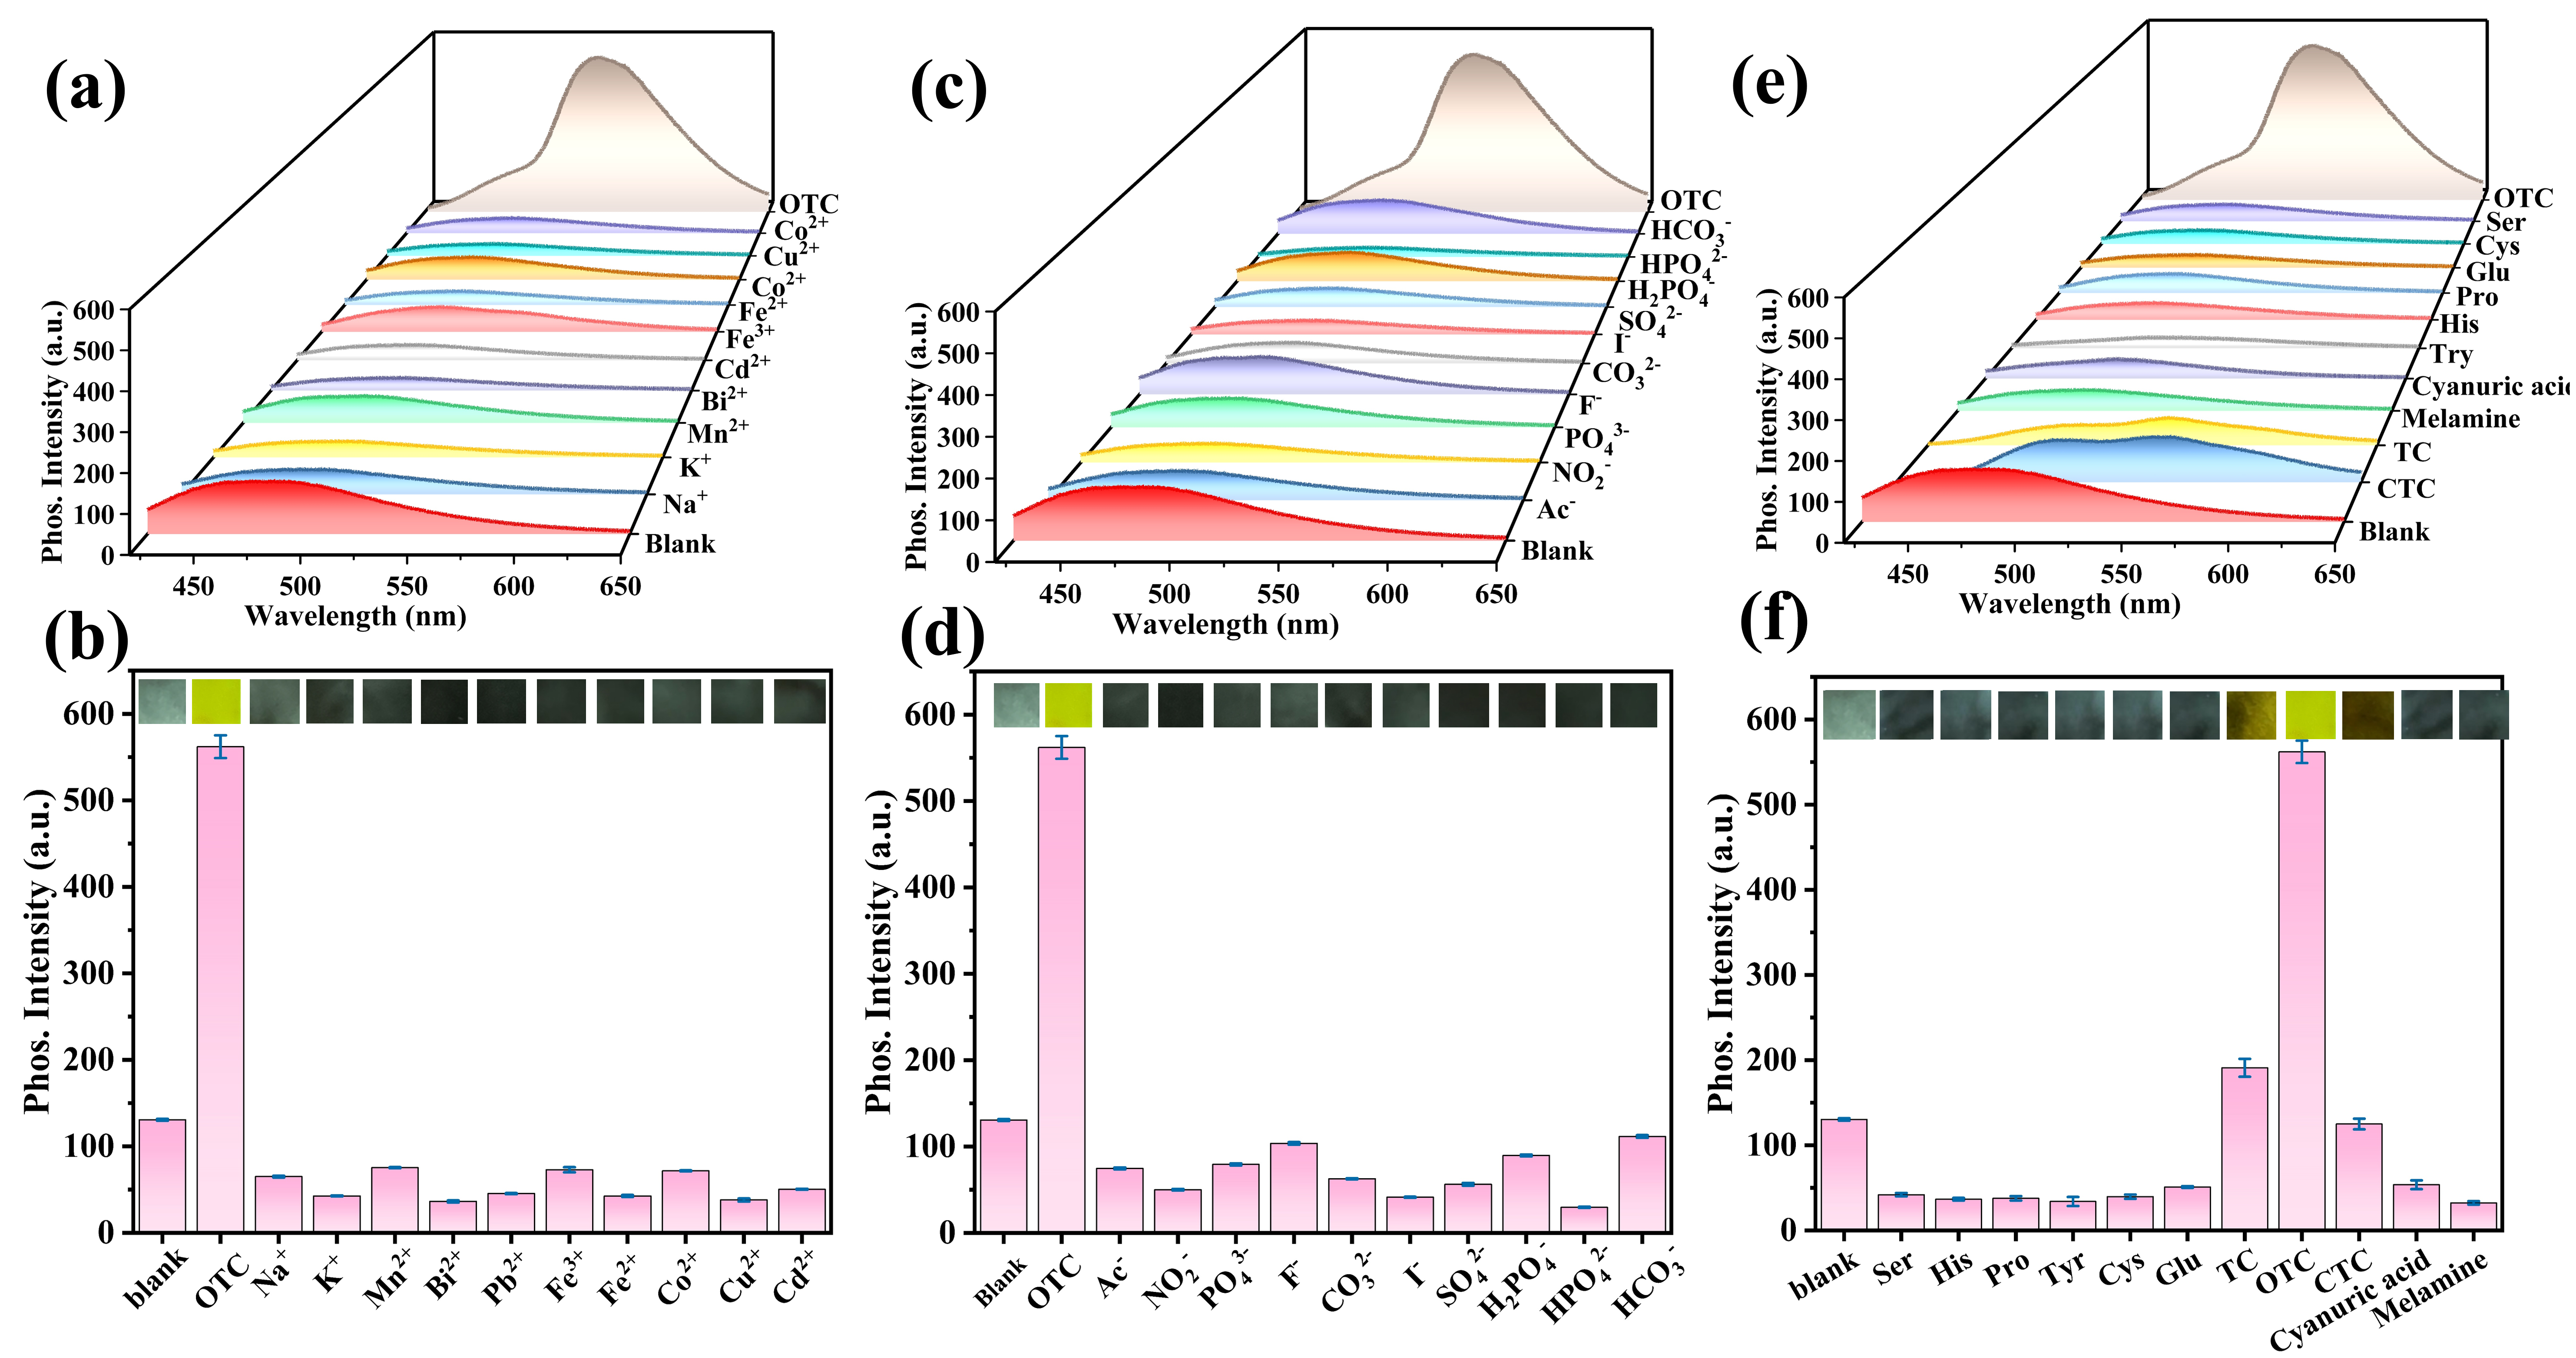


**Figure S8.** Fluorescence spectra (a), UV-visible diffuse reflectance spectroscopy (b) and FTIR spectra (c) of probe and probe+OTC.


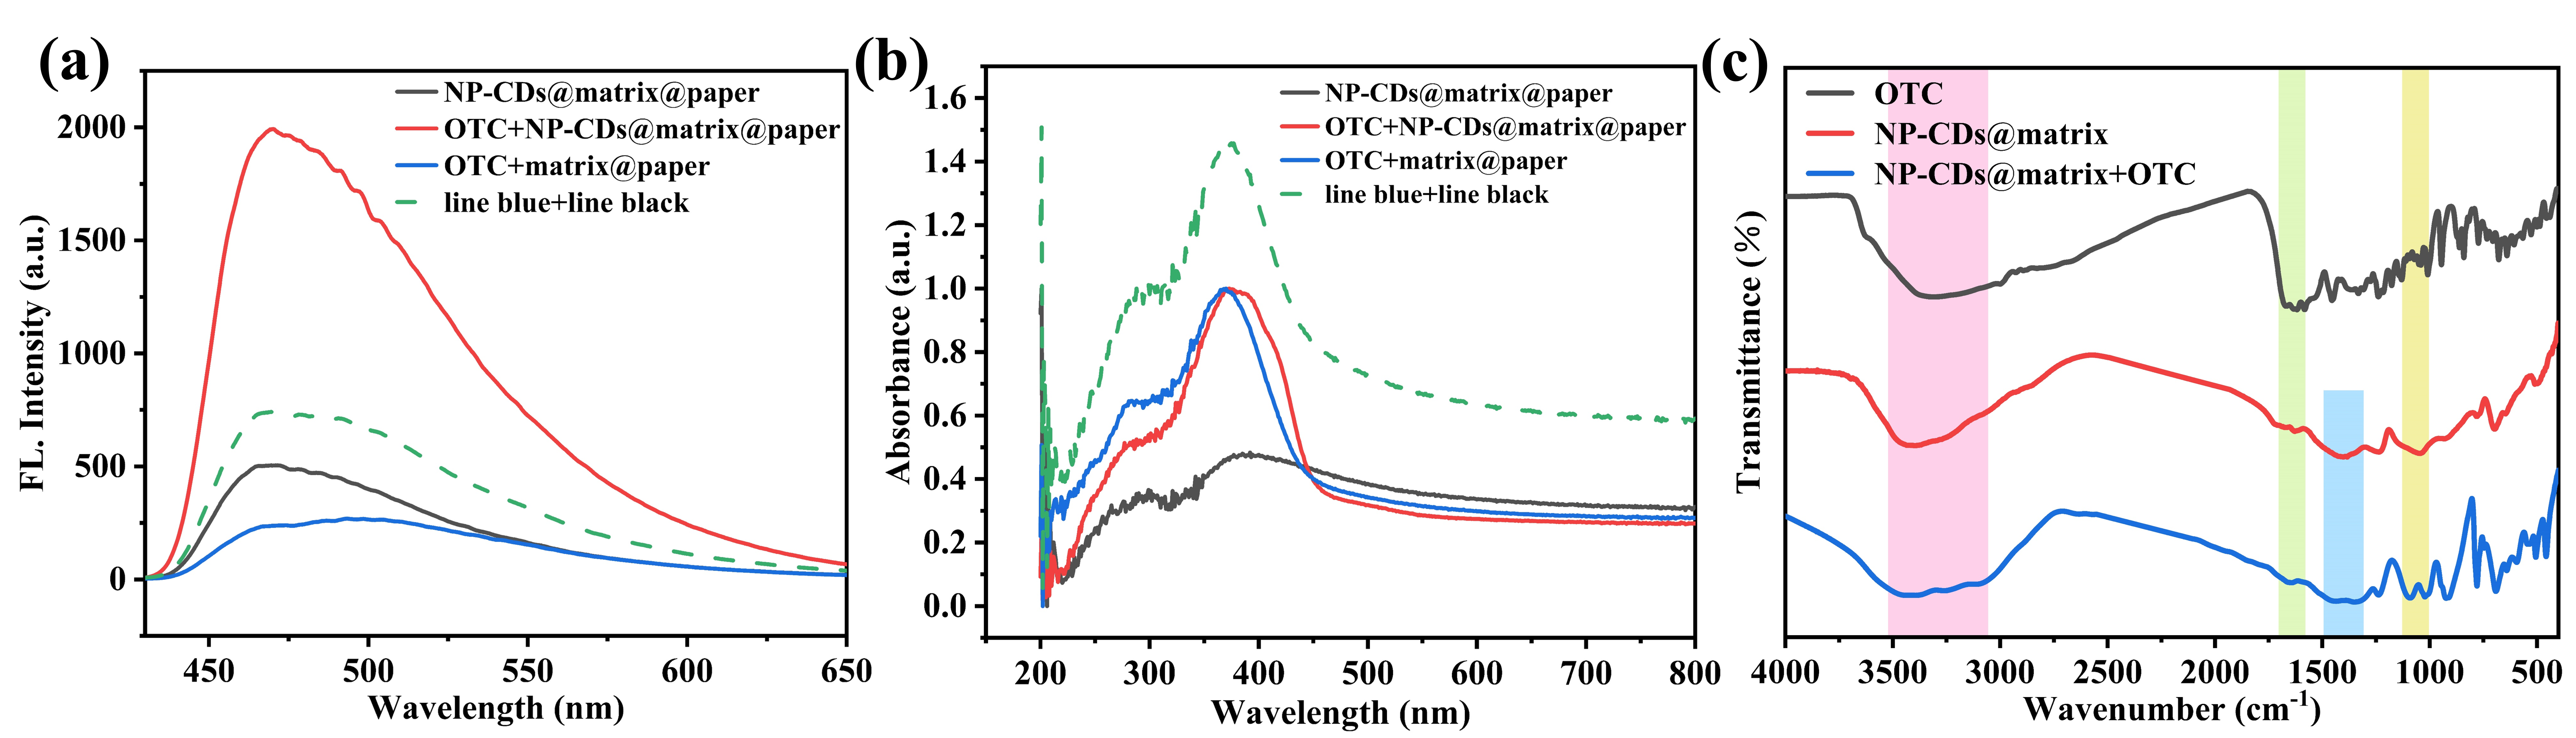


**Figure S9.** Phosphorescence spectra (a) and histograms (b) of the probe (NP-CDs@matrix@paper) under different pH conditions. Phosphorescence spectra (c, d) and line plots(e) of probe and probe plus OTC at different excitation wavelengths.


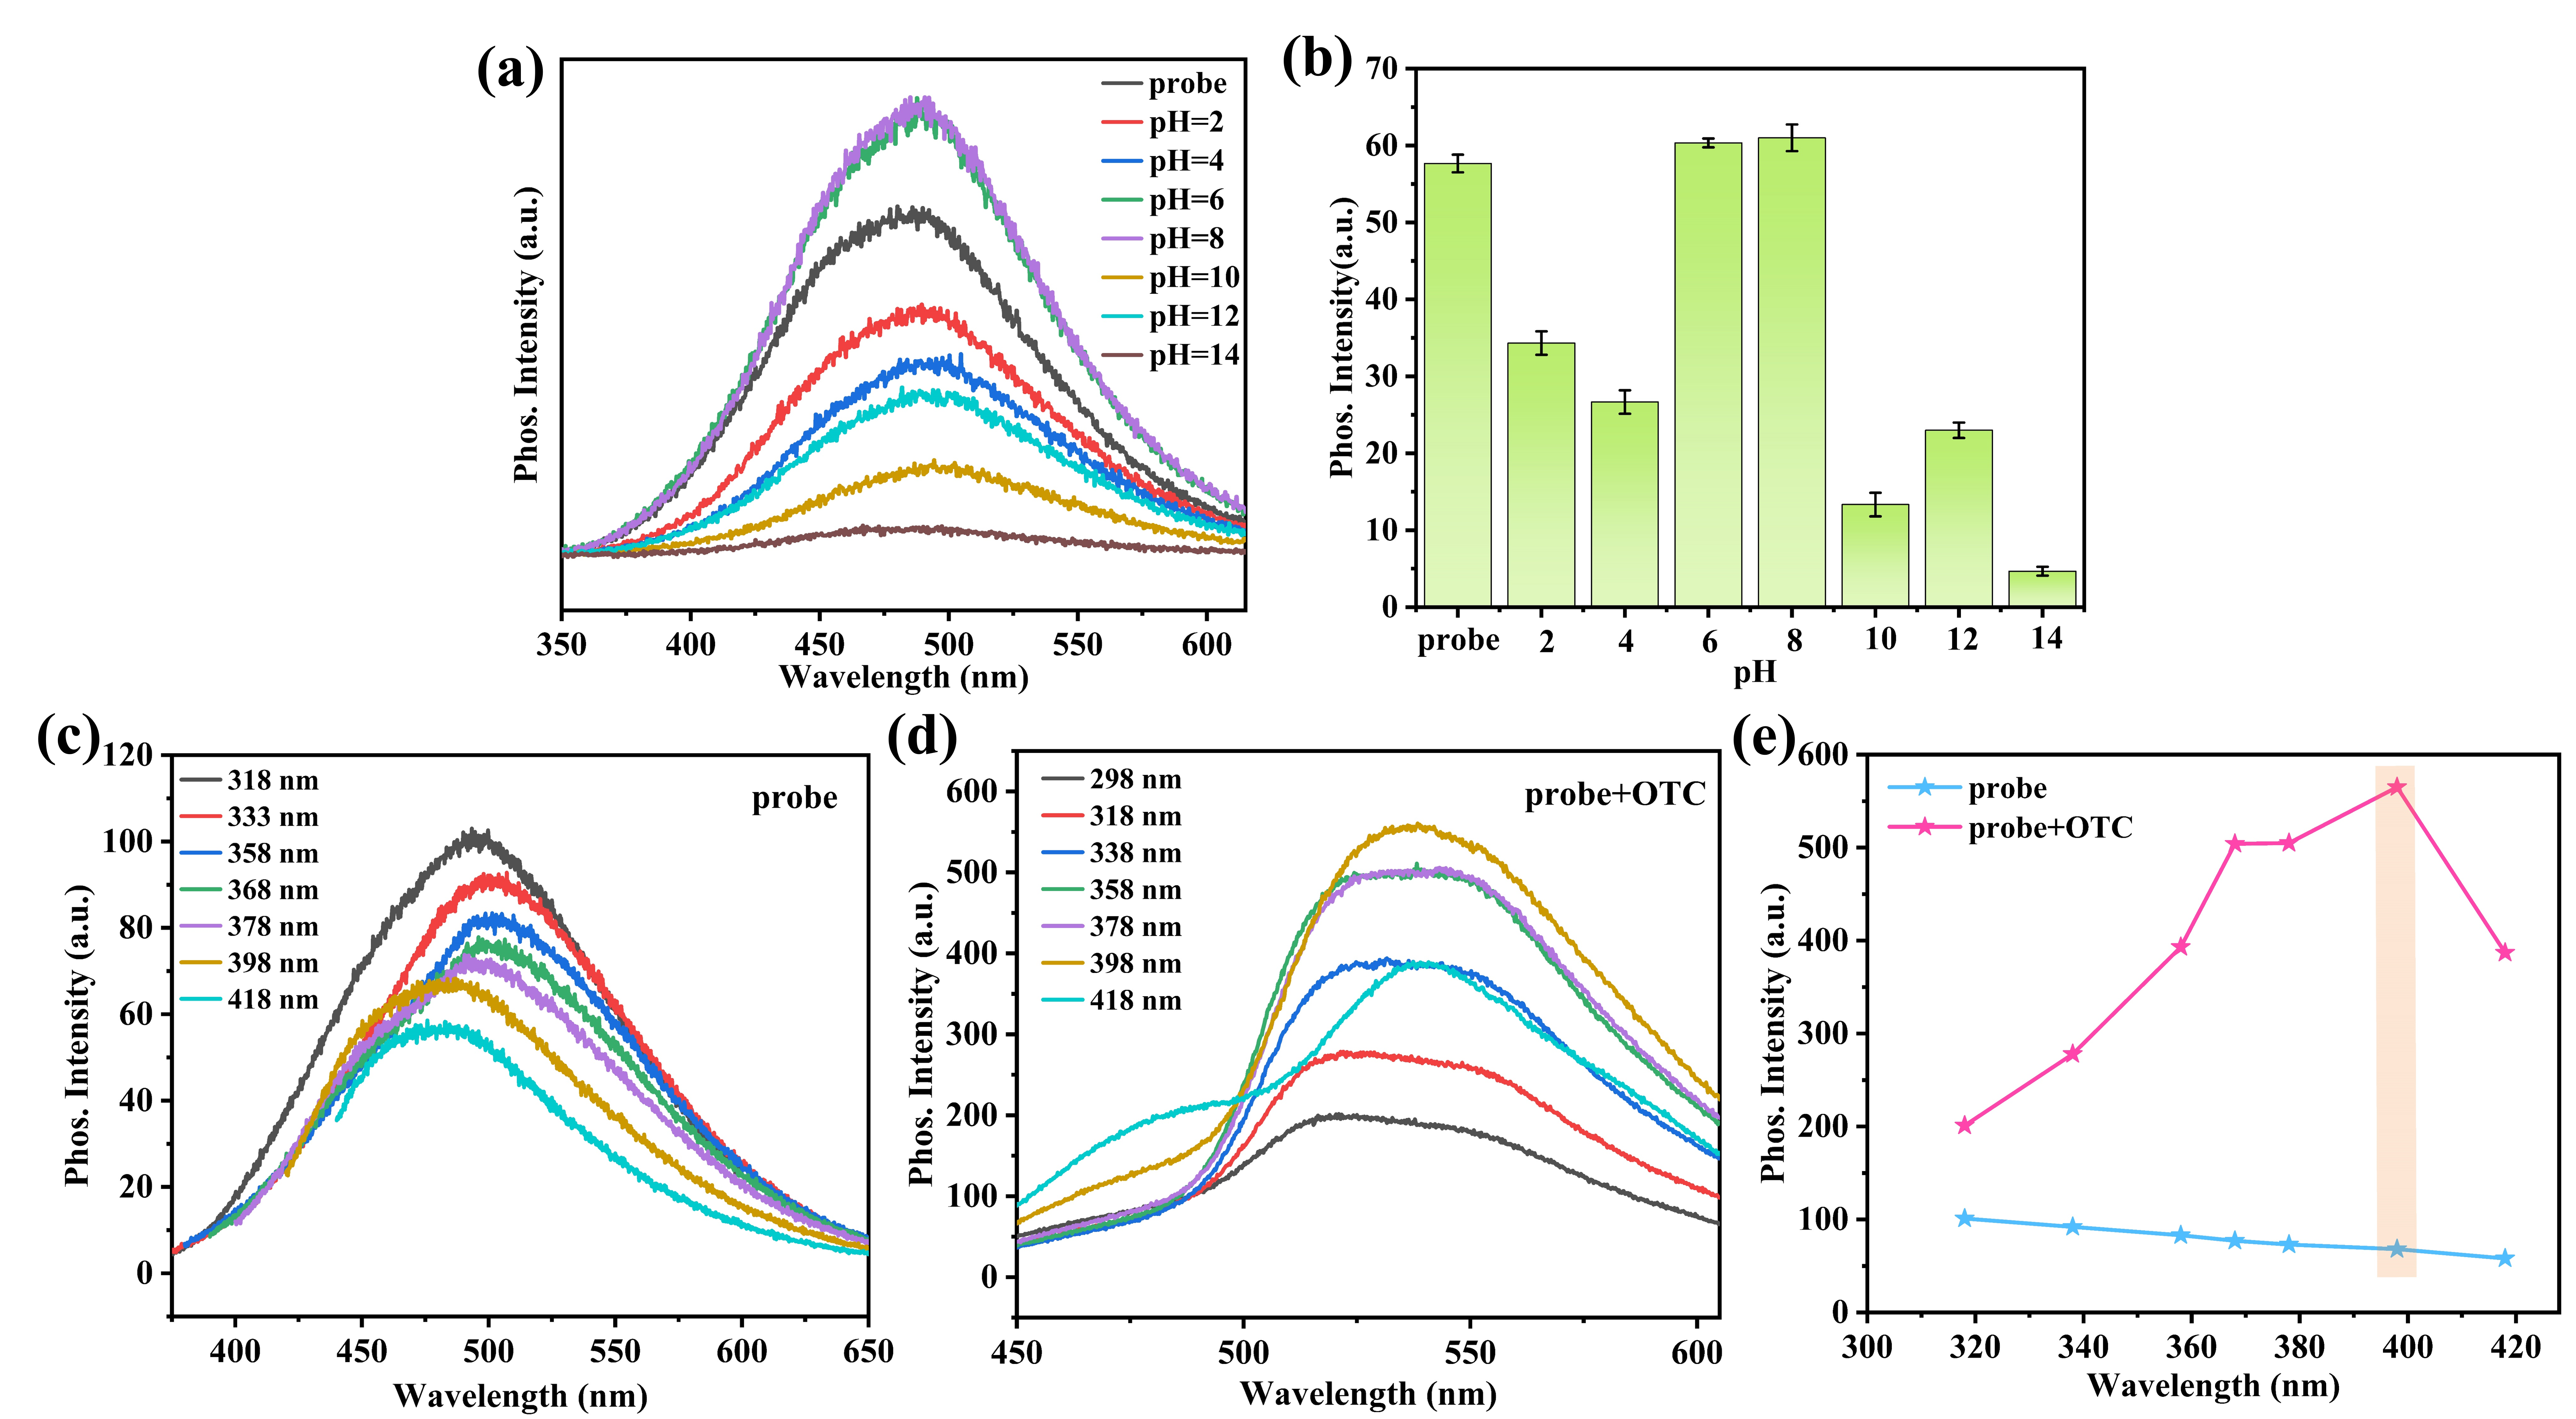


**Table S1** Comparison with other sensing methods

| Methods | Probe | Range | LOD | Ref. |
| --- | --- | --- | --- | --- |
| Fluorometric  Fluorometric  Fluorometric  Fluorometric  Fluorometric  Fluorometric  Fluorometric  Phosphorescence  Phosphorescence | MIP-coated CDs  CD@AMP/EuNCPs  Stalk-Trp CDs  ATOCN/Eu(DPA)3/CD  B-CDs  N-CDs  Eu-CDs  CDs@LP  NP-CDs@matrix@paper | 50-900  (ng/mL)  0.2-60  (μmol/L)  6-100  (μmol/L)  0-6  (mg/L)  0.2-60  (μg/L)  0.1-45  (μmol/L)  1-603.75  (μmol/L)  1-100  (μmol/L)  2-800  (μmol/L) | 15.3  (ng/mL-1)  23  (nmol/L)  18  (nmol/L)  0.019  (mg/L)  0.1  (μg/L)  0.017  (μmol/L)  9.5  (nmol/L)  0.27  (μmol/L)  1.17  (μmol/L) | [1]  [2]  [3]  [4]  [5]  [6]  [7]  [8]  This work |
|  |  |  |  |  |

References

[1] Liu H, Ding L, Chen L, et al. A facile, green synthesis of biomass carbon dots coupled with molecularly imprinted polymers for highly selective detection of oxytetracycline [J]. Journal of Industrial and Engineering Chemistry, 2019, 69: 455-63.

[2] Chen L, Xu H, Wang L, et al. Portable ratiometric probe based on the use of europium(III) coordination polymers doped with carbon dots for visual fluorometric determination of oxytetracycline [J]. Microchimica Acta, 2020, 187(2).

[3] Arkin K, Zheng Y, Bei Y, et al. Construction of dual-channel ratio sensing platform and molecular logic gate for visual detection of oxytetracycline based on biomass carbon dots prepared from cherry tomatoes stalk [J]. Chemical Engineering Journal, 2023, 464.

[4] Yue Y, Gu J, Cheng W, et al. Solid–liquid convertible hydrogel mediated by dual-functional cellulose nanofiber/Eu–dipicolinic acid/carbon dot complexes for high-precision sequential luminescence detection of cupric ion and oxytetracycline [J]. Composites Science and Technology, 2023, 232.

[5] Li Z, Li S, Jiang L, et al. High enrichment and sensitive measurement of oxytetracycline in tea drinks by thermosensitive magnetic molecular imprinting based magnetic solid phase extraction coupled with boron doped carbon dots [J]. Food Chemistry, 2024, 447.

[6] Wu H, Chen Y, Xu M, et al. Dual-response fluorescent probe based on nitrogen-doped carbon dots and europium ions hybrid for ratiometric and on-site visual determination of oxytetracycline and tetracycline [J]. Science of The Total Environment, 2023, 860.

[7] Fan Y J, Wang Z G, Su M, et al. A dual-signal fluorescent colorimetric tetracyclines sensor based on multicolor carbon dots as probes and smartphone-assisted visual assay [J]. Analytica Chimica Acta, 2023, 1247.

[8] Wang Q, Tan Q, Zhao S, et al. Dual-responsive carbon dots-based luminophore for ratiometric fluorescence and room-temperature phosphorescence detection of oxytetracycline [J]. Chemical Engineering Journal, 2023, 470.
